# Supplementary material
Source: Springer Nature journal article supplement (https://www.springermedizin.de/resource/supplementary/12997_2005_2_MOESM1_ESM.pdf/9623082)

# Airway Afferent Nerves

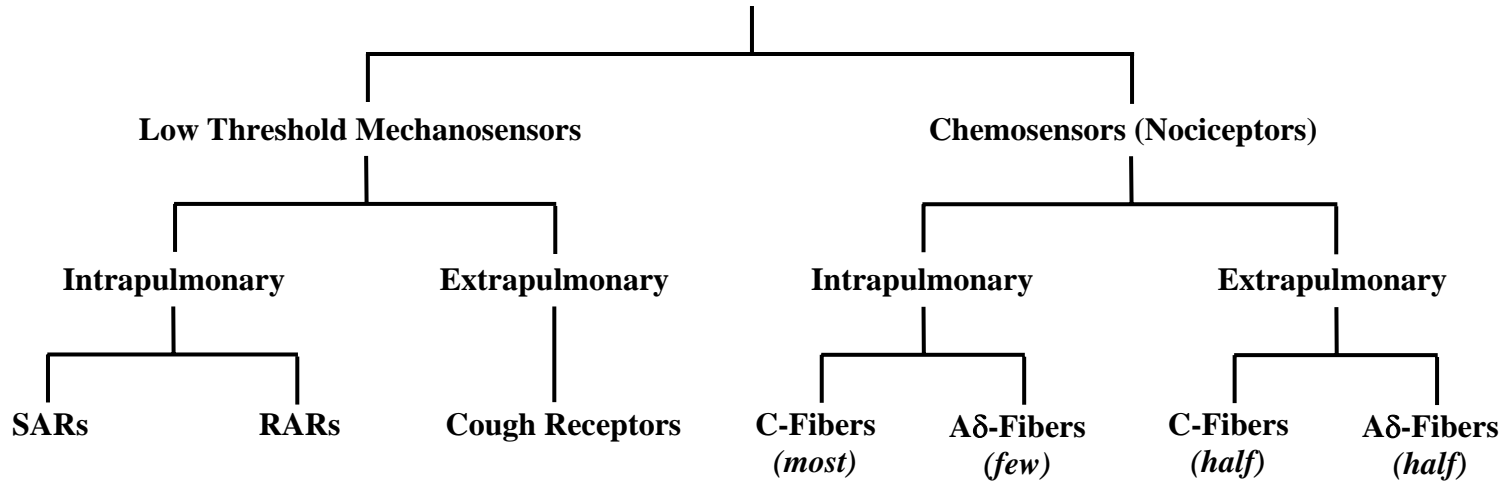

Supplement: MOESM1 [file 9623082]
